# Supplementary material for: Transcription regulator TRIP-Br2 mediates ER stress-induced brown adipocytes dysfunction
Source: PubMed Central journal article supplement (PMC5220316; doi:10.1038/srep40215), 2017-01-09

## Supplementary Information

### Transcription regulator TRIP-Br2 mediates ER stress-induced brown adipocytes dysfunction

Guifen Qiang<sup>1,2</sup>, Hyerim Whang Kong<sup>2</sup>, Victoria Gil<sup>2</sup>, Chong Wee Liew<sup>2</sup>

<sup>1</sup>Current affiliation: State Key Laboratory of Bioactive Substances and Functions of Natural Medicines, Institute of Materia Medica, Chinese Academy of Medical Sciences and Peking Union Medical College, Beijing, 100050, China

<sup>2</sup>Department of Physiology & Biophysics, College of Medicine, University of Illinois at Chicago, 835 S Wolcott Ave, M/C901, Chicago, IL, 60612, United States

## Supplementary Figure Legends

### Supplementary Figure S1

qPCR analysis of ER stress markers (a) *Xbp1s* (b) *Creb3*, (c) *Atf4* and (d) *Atf6* gene expression in brown adipose tissues harvested from mice 6, 12 or 18 h after intraperitoneal (IP) injection with vehicle or tunicamycin (2.5 mg/kg)(n=5). All qPCR data are normalized with TBP and presented as mean ± SEM. \*,p<0.05; \*\*,p<0.01; \*\*\*,p<0.001 (vs Ctrl).

### Supplementary Figure S2

qPCR analysis of ER stress markers (a) *Xbp1s* (b) *Creb3*, (c) *Atf4* and (d) *Atf6* gene expression in brown adipose tissues harvested from mice after 12 wk of CD, HFD, or HFD with TUDCA (250 mg/kg at 8am and 8pm, i.p., total 500 mg/kg for 15 days) (n=5). All qPCR data are normalized with TBP and presented as mean ± SEM. \*,p<0.05; \*\*,p<0.01; \*\*\*,p<0.001 (vs CD); #,p<0.05; ###,p<0.001 (vs HFD).

**Supplementary Table 1**

| Primer sequences used in this study |              |                                        |
|-------------------------------------|--------------|----------------------------------------|
| <b>Gene</b>                         |              | <b>Primer sequence</b>                 |
| mTrip-br2                           | Forward: 5'- | ATA TAT GTT GGG TAA AGG AGG AA -3'     |
|                                     | Reverse: 5'- | TGG CGC TGT AAG GTG TAA GAC -3'        |
| mBip                                | Forward: 5'- | TTC AGC CAA TTA TCA GCA AAC TCT -3'    |
|                                     | Reverse: 5'- | TTT TCT GAT GTA TCC TCT TCA CCA GT -3' |
| mChop                               | Forward: 5'- | CCA CCA CAC CTG AAA GCA GAA -3'        |
|                                     | Reverse: 5'- | AGG TGA AAG GCA GGG ACT CA -3'         |
| mTbp                                | Forward: 5'- | ACC CTT CAC CAA TGA CTC CTA TG -3'     |
|                                     | Reverse: 5'- | ATG ATG ACT GCA GCA AAT CGC -3'        |
| mAtgl                               | Forward: 5'- | TAGCTAACAGTTGGGCTTCAC                  |
|                                     | Reverse: 5'- | CAGAGAGAACAGAGCAGCTTAC                 |
| mHsl                                | Forward: 5'- | ACGGATACCGTAGTTTGGTGC                  |
|                                     | Reverse: 5'- | TCCAGAAGTGCACATCCAGGT                  |
| mUcp1                               | Forward: 5'- | CTGCCAGGACAGTACCCAAG                   |
|                                     | Reverse: 5'- | TCAGCTGTTCAAAGCACACA                   |
| mAdrb3                              | Forward: 5'- | GCTCTGTGTCTCTGGTTAGTTT                 |
|                                     | Reverse: 5'- | GTCCAAGATGGTGCTTAGAGAG                 |
| mAox                                | Forward: 5'- | TCCTTAAACACCCACCCACCAAGA               |
|                                     | Reverse: 5'- | AAGAAAGGGAAGGTCAGCCACCAT               |
| mCytc                               | Forward: 5'- | GCTACCCATGGTCTCATCGT                   |
|                                     | Reverse: 5'- | CATCATCATTAGGGCCATCC                   |
| mCox8b                              | Forward: 5'- | GAACCATGAAGCCAACGACT                   |
|                                     | Reverse: 5'- | GCGAAGTTCACAGTGGTTCC                   |
| mNdufs1                             | Forward: 5'- | CTTCAGGGAGGCATTATTCT                   |
|                                     | Reverse: 5'- | ATTGCTGCTCCATCATCTCTC                  |
| mSdhb                               | Forward: 5'- | CTGCCACACCATCATGAACT                   |
|                                     | Reverse: 5'- | CTTGTAGGTCGCCATCATCTTC                 |
| mUqcrc1                             | Forward: 5'- | CAGATCGAGAAGGAACGAGATG                 |
|                                     | Reverse: 5'- | GTCGCATGCAGGTAATCAAAG                  |
| mAtp5j                              | Forward: 5'- | CTCTTCGTGGACAAGATAAGAGAG               |
|                                     | Reverse: 5'- | CTCTGTCCAGATCTTGCTGATAC                |

Supplementary Figure S1

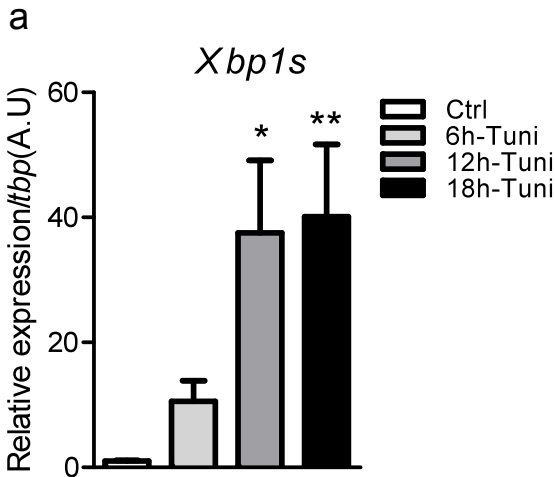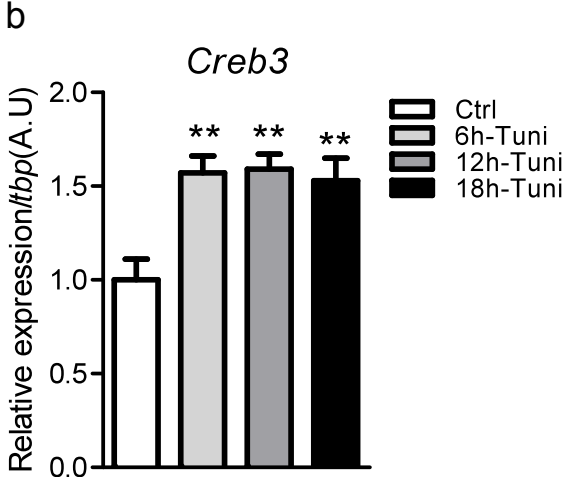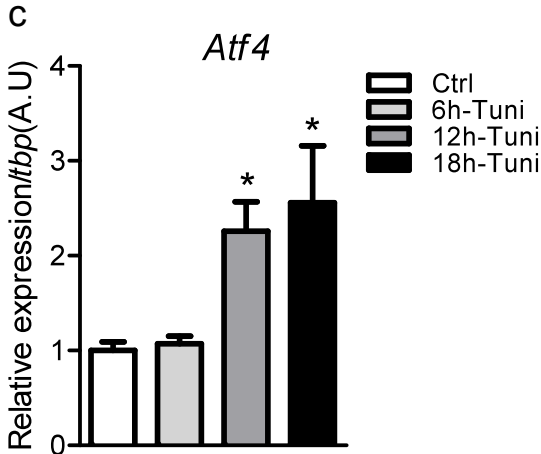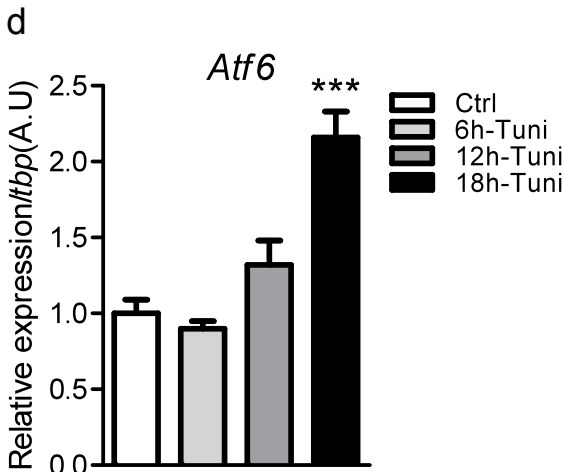

Supplementary Figure S2

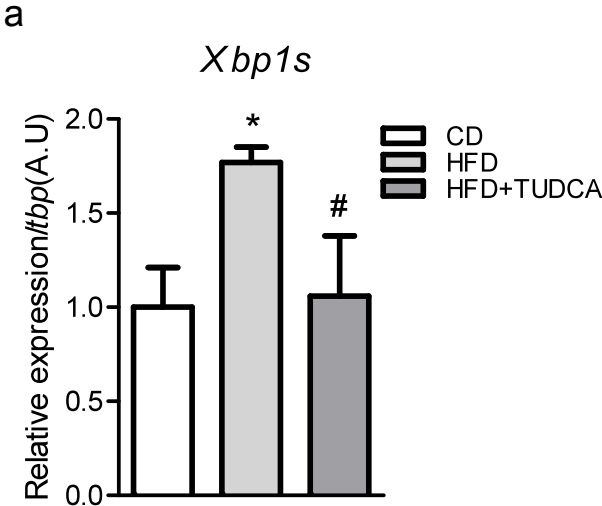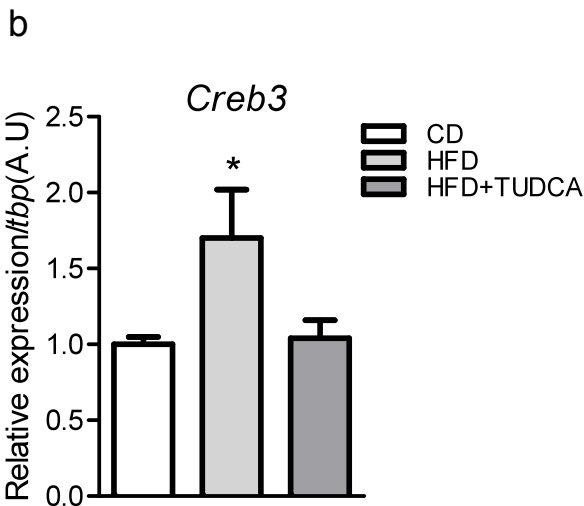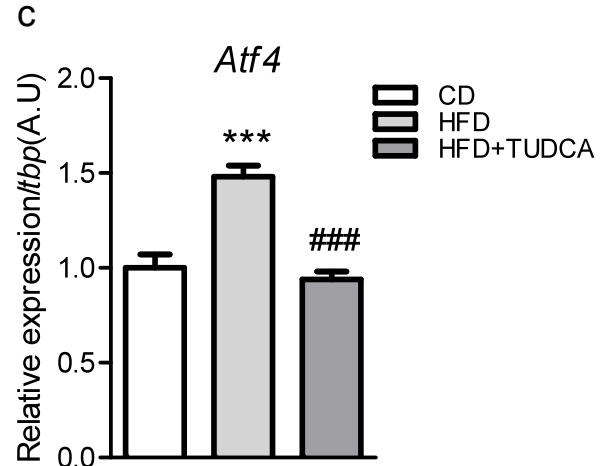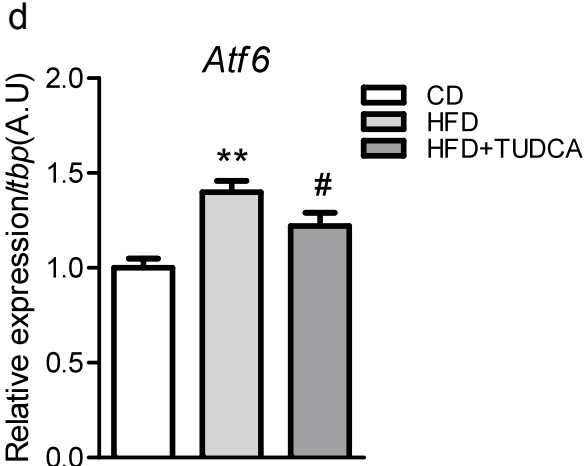



Uncut blot for Figure 2d

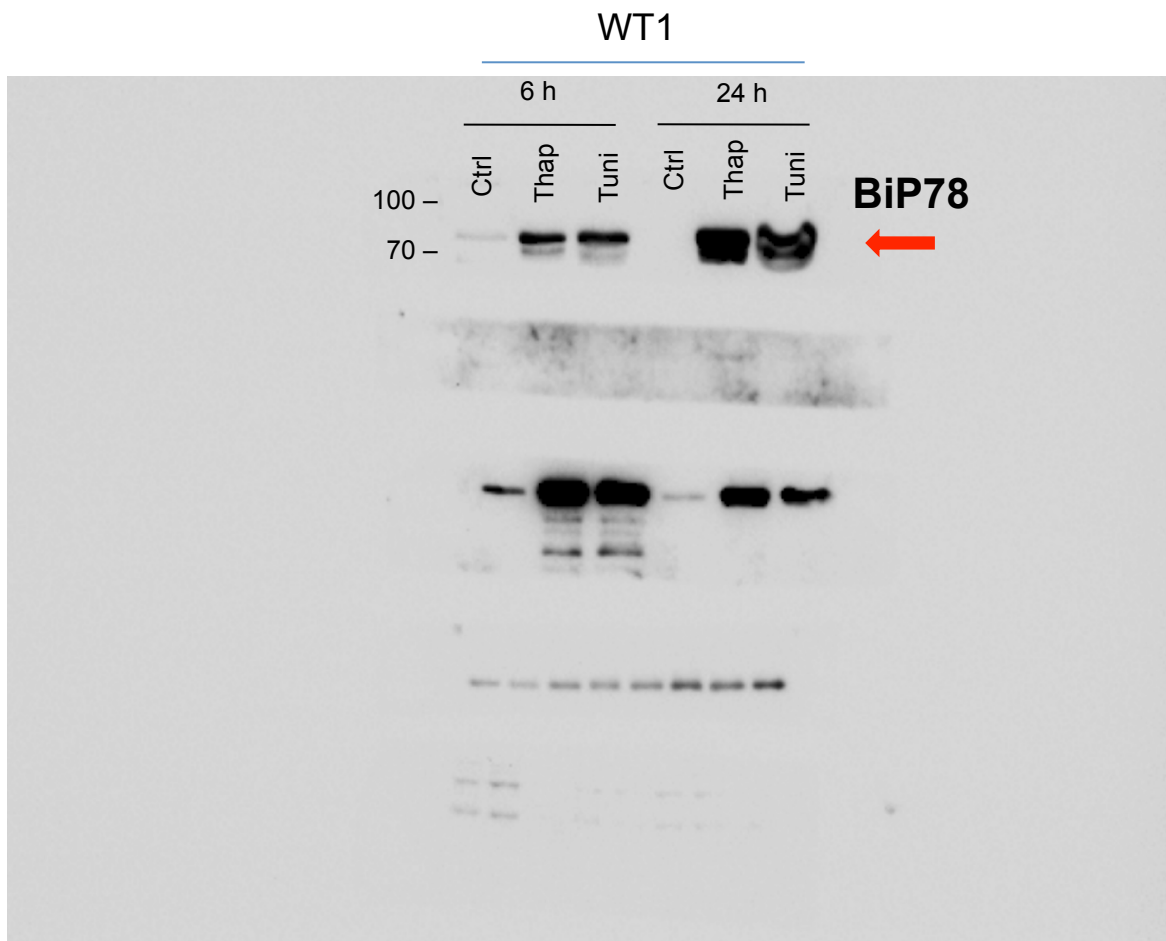

# Uncut blot for Figure 2d

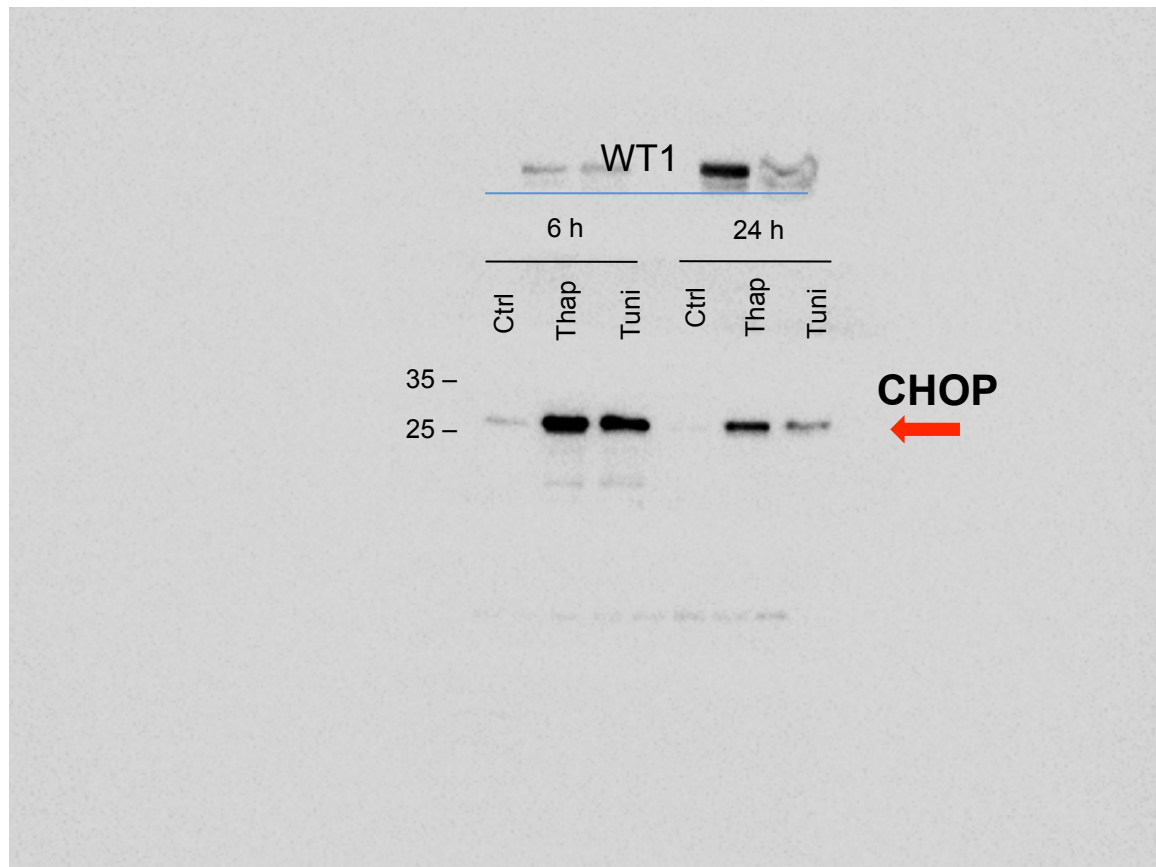

Uncut blot for Figure 2d

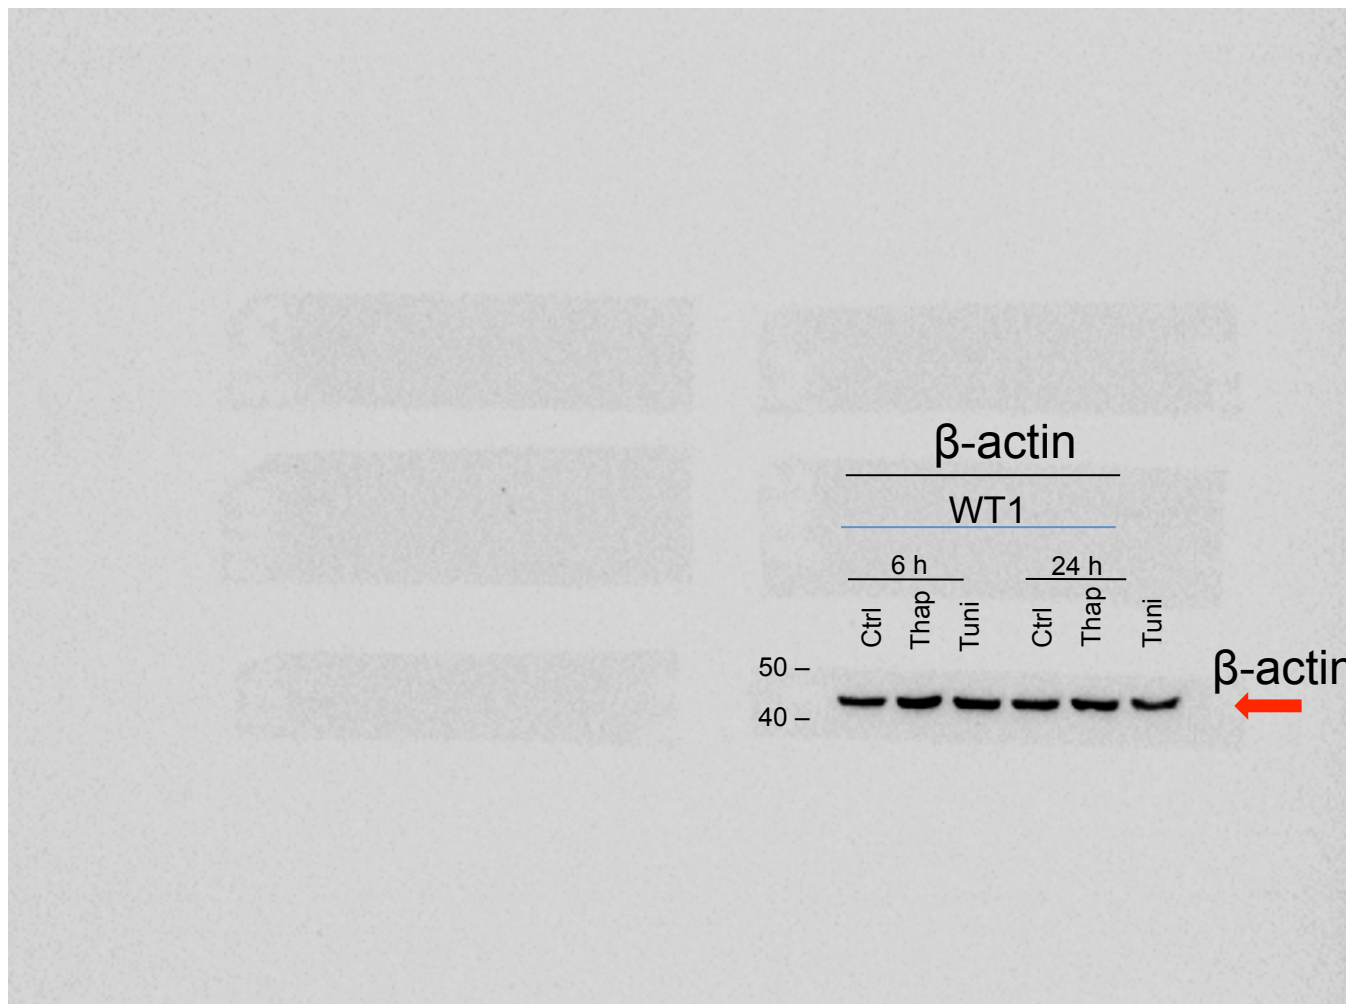

5/9/2014

60 min

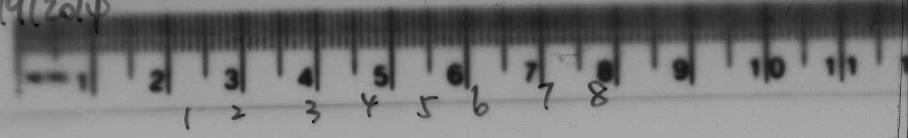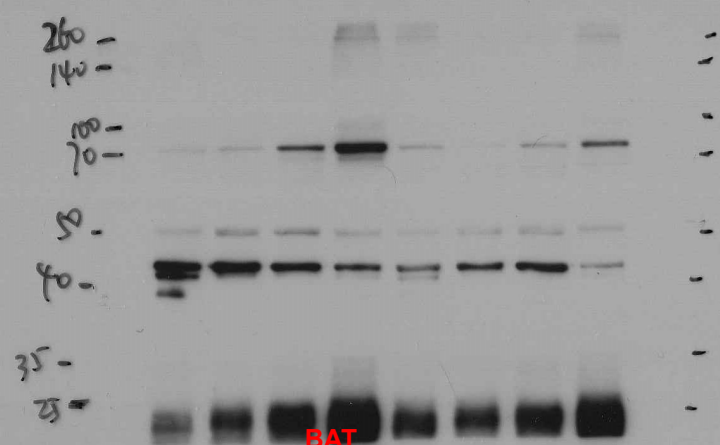

9 10 12  
Tunf  
Ctrl 6h 12h 18h

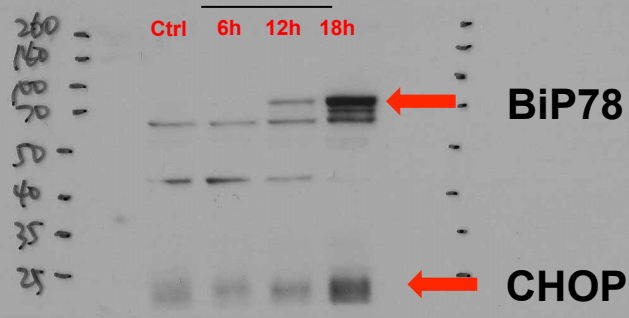

# Uncut blot for Figure 3d

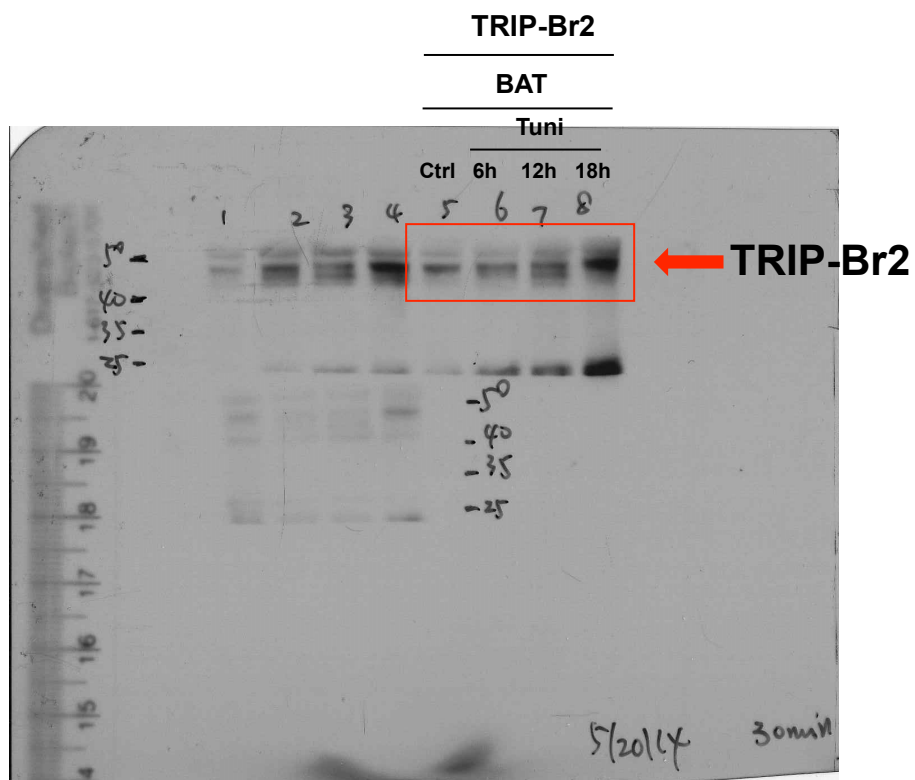

# Uncut blot for Figure 3d

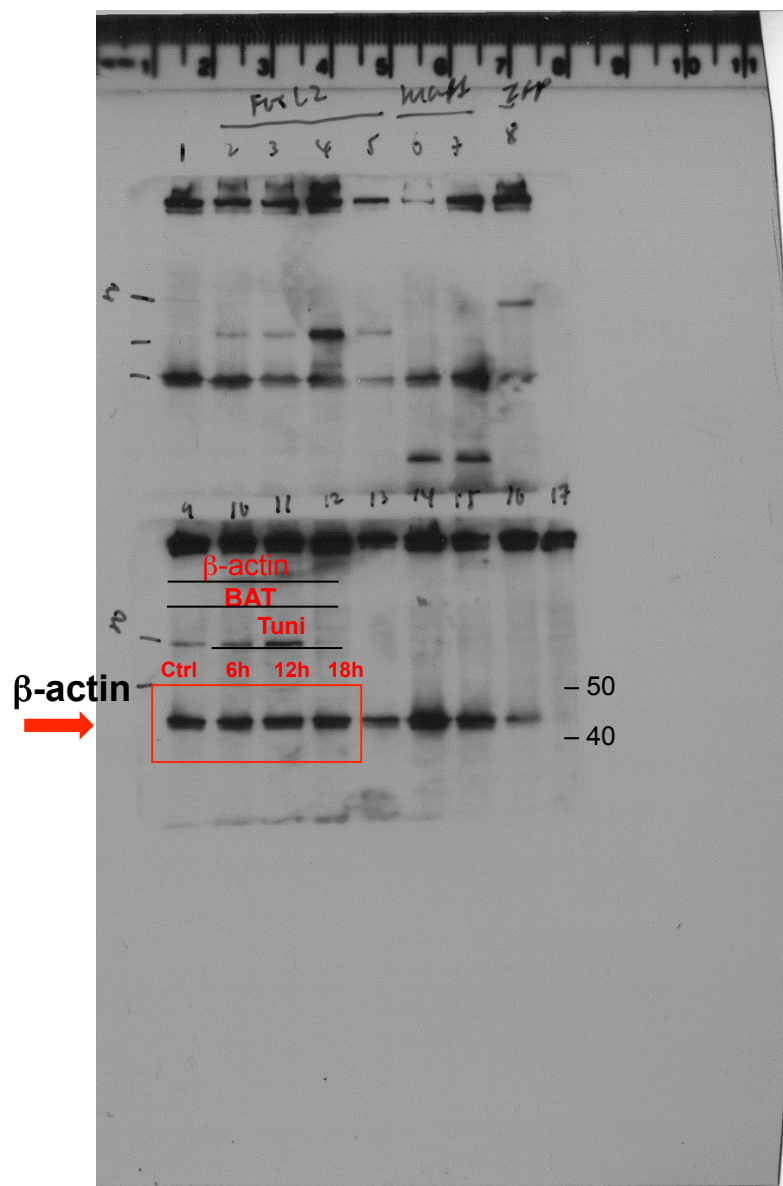

Uncut blot for Figure 4d

BAT

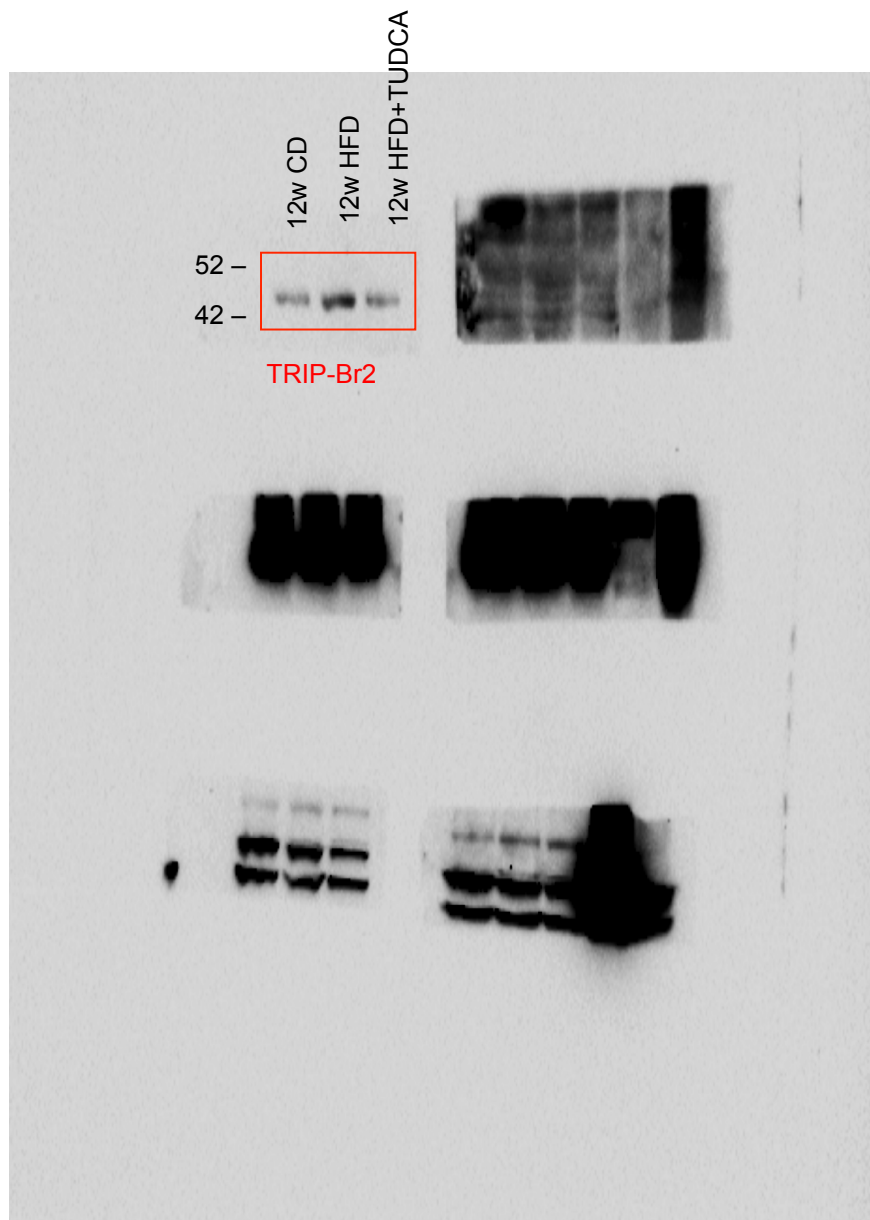



# Uncut blot for Figure 4d

BAT

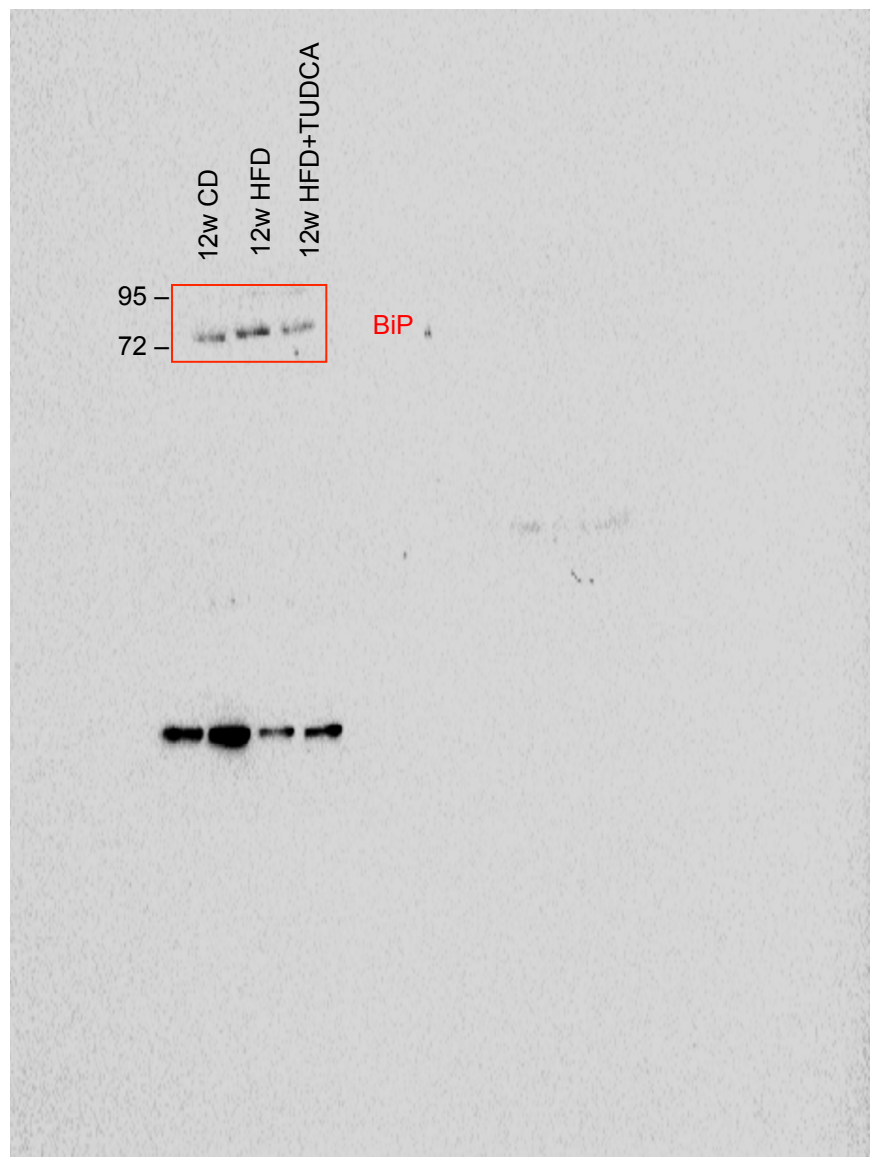



# Uncut blot for Figure 4d

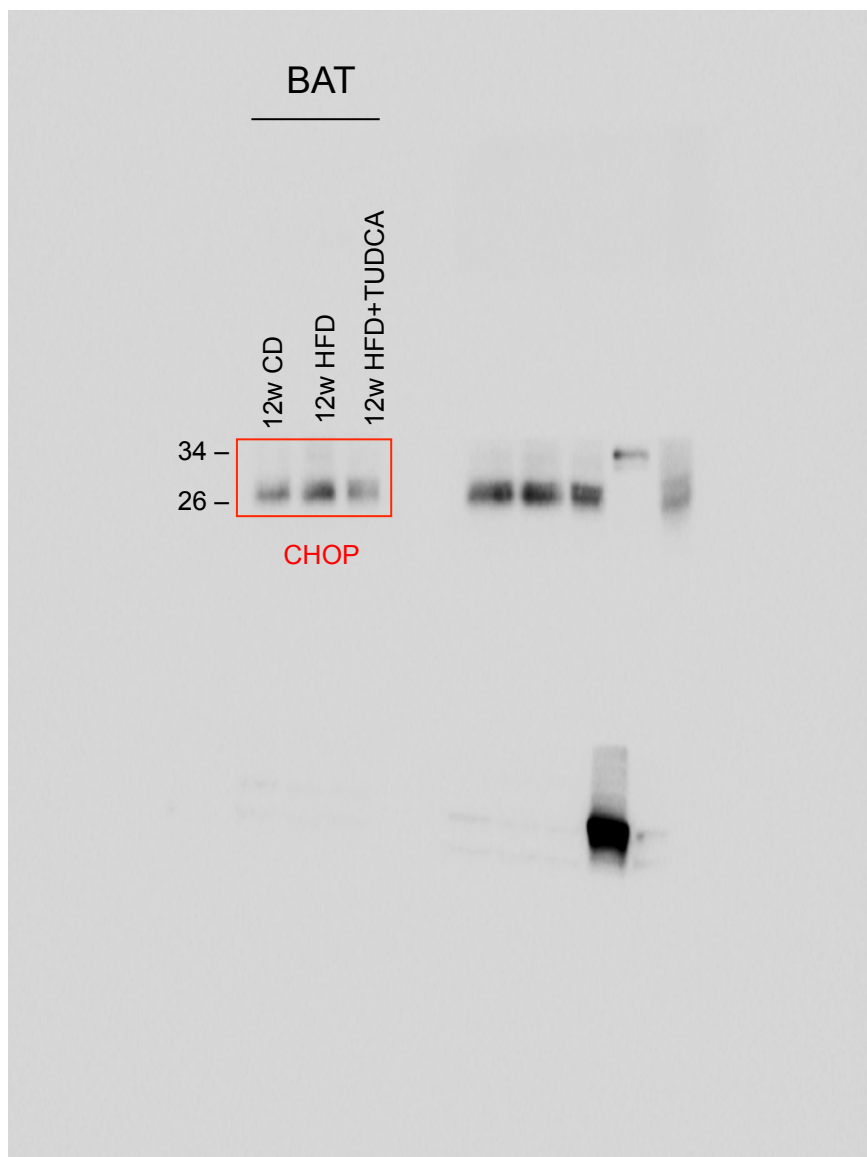

Uncut blot for Figure 4d

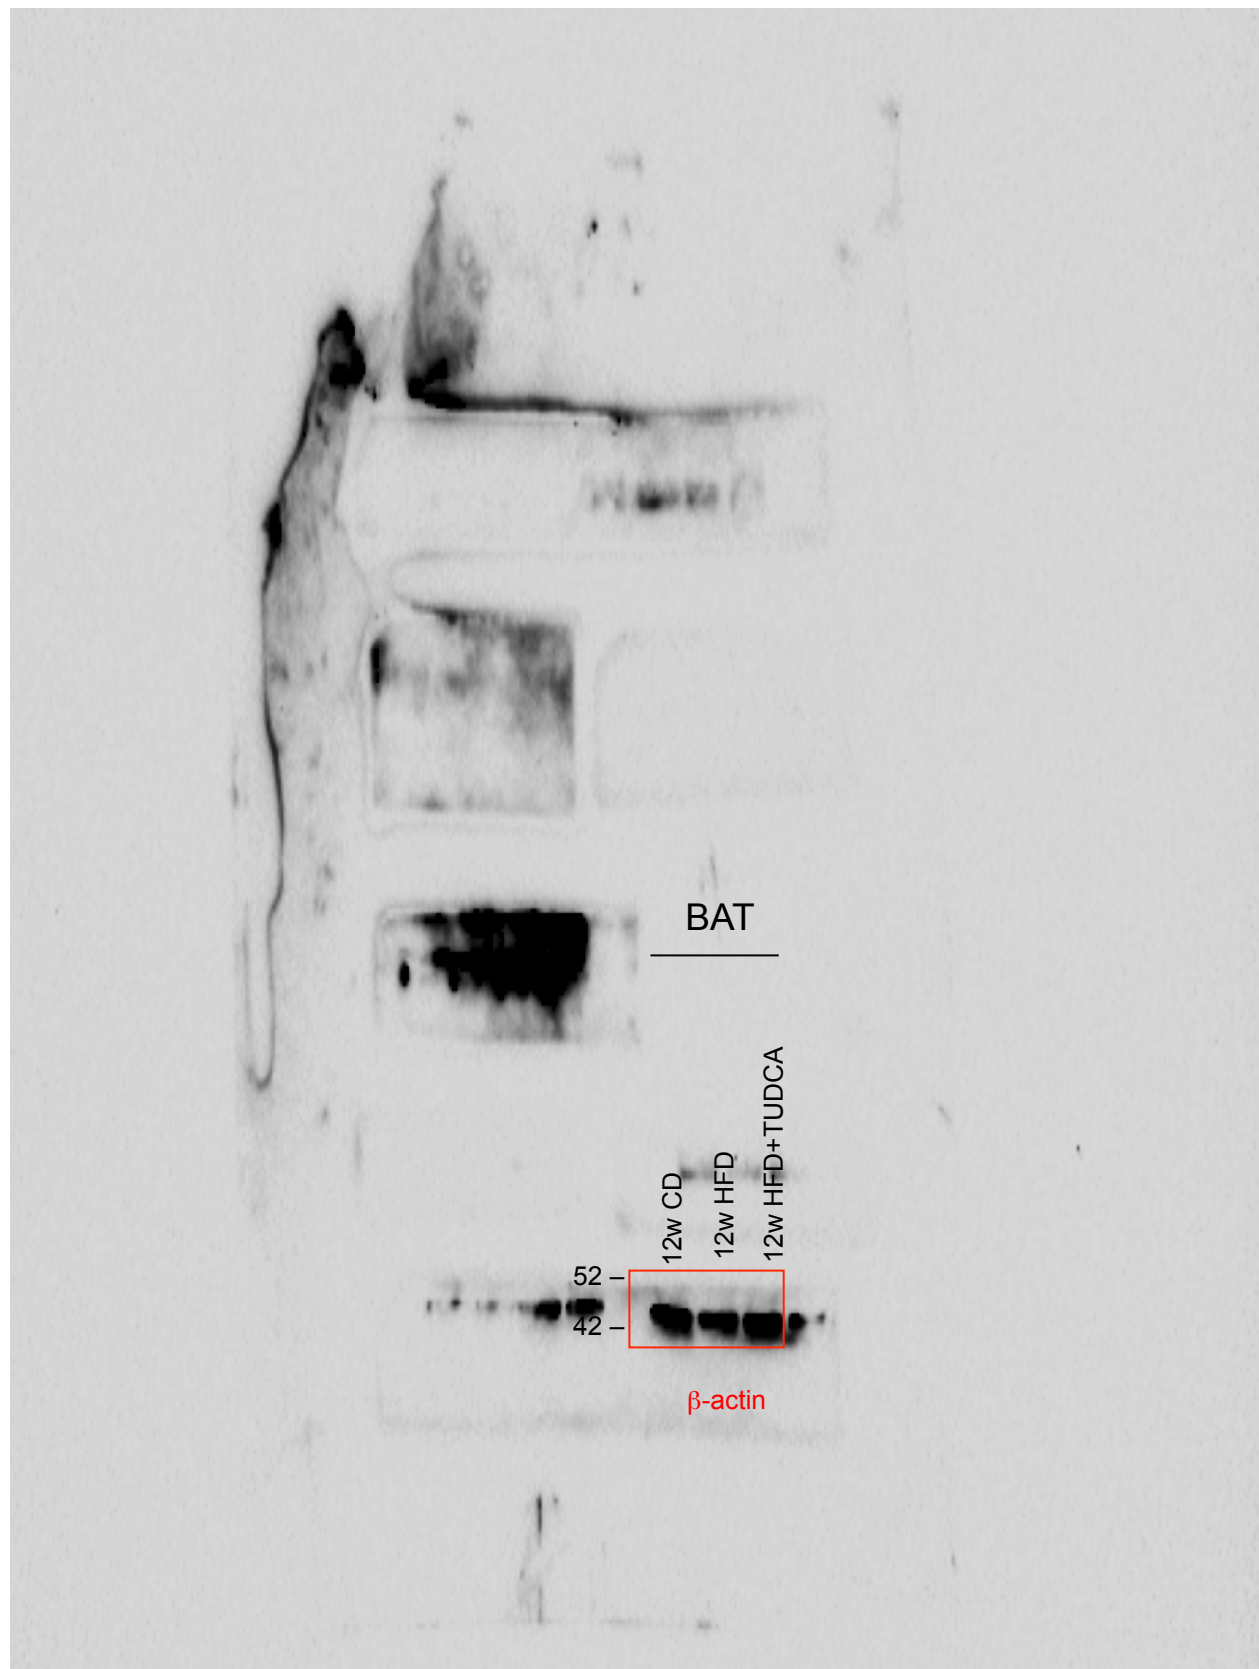

Uncut blot for Figure 5d

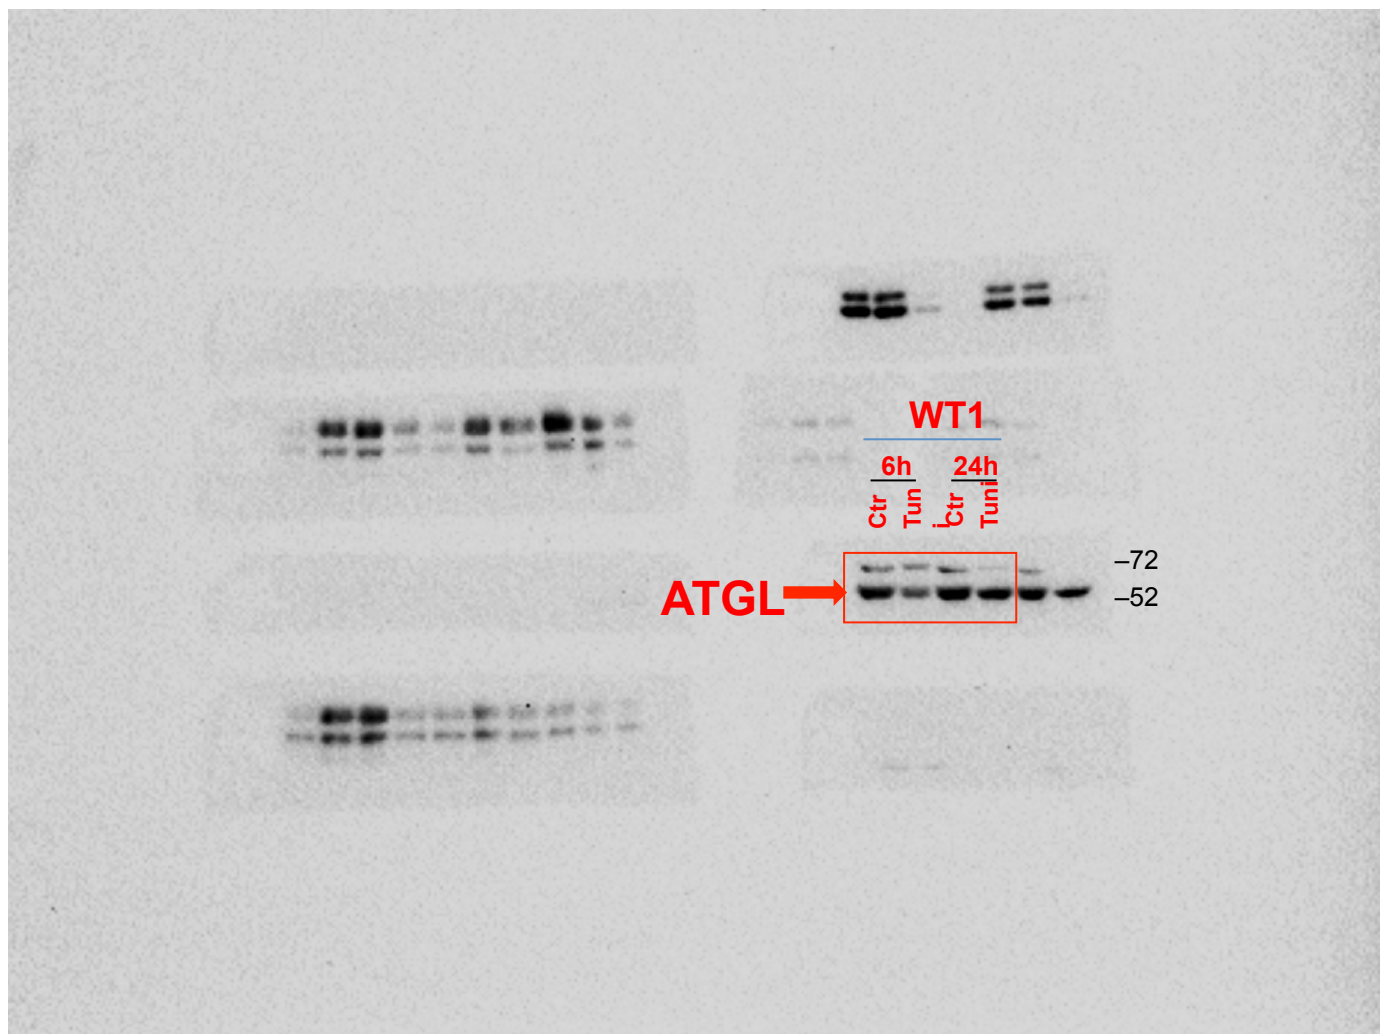

Uncut blot for Figure 6b

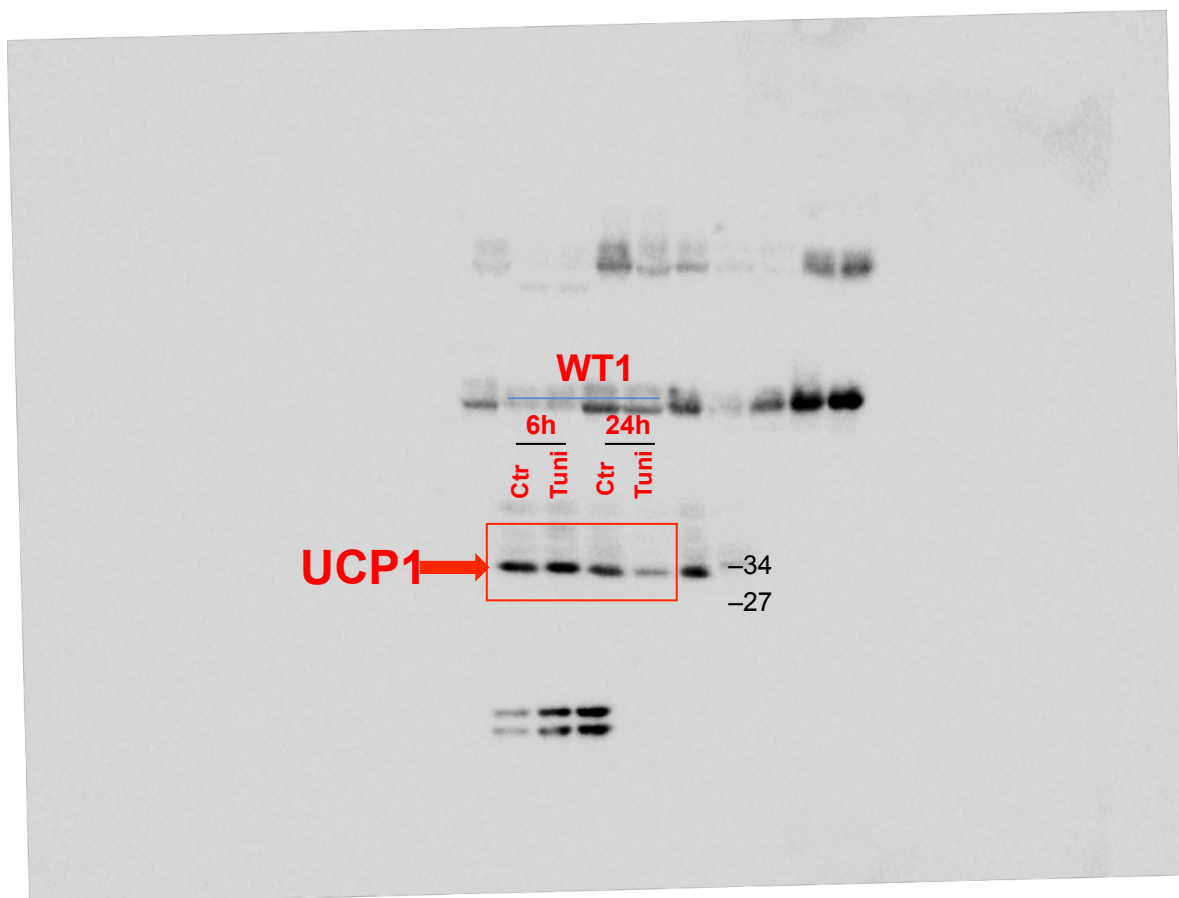

Supplement: srep40215-s1.pdf [file srep40215-s1.pdf]
